# Supplementary material for: Biosynthesis of Random-Homo Block Copolymer Poly[Glycolate-ran-3-Hydroxybutyrate (3HB)]-b-Poly(3HB) Using Sequence-Regulating Chimeric Polyhydroxyalkanoate Synthase in Escherichia coli
Source: Frontiers journal article supplement (doi:10.3389/fbioe.2020.612991), 2020-12-08
Supplement: Data_Sheet_1.PDF [file Data_Sheet_1.PDF]

Supporting Information

for

**Biosynthesis of random-homo block copolymer poly[glycolate-*ran*-3-hydroxybutyrate (3HB)]-*b*-poly(3HB) using sequence-regulating chimeric polyhydroxyalkanoate synthase in *Escherichia coli***

Shuzo Arai<sup>1</sup>, Sayaka Sakakibara<sup>1</sup>, Robin Mareschal<sup>2,3</sup>, Toshihiko Ooi<sup>4</sup>, Manfred Zinn<sup>3</sup>  
and Ken'ichiro Matsumoto<sup>4,\*</sup>

<sup>1</sup>Graduate School of Chemical Sciences and Engineering, Hokkaido University, Sapporo, Japan, <sup>2</sup>Department of Engineering, Hokkaido University, Sapporo, Japan, <sup>3</sup>Institute of Life Technologies, University of Applied Sciences and Arts Western Switzerland (HES-SO Valais-Wallis), Sion, Switzerland, and <sup>4</sup>Division of Applied Chemistry, Faculty of Engineering, Hokkaido University, Sapporo, Japan.

Scheme S1

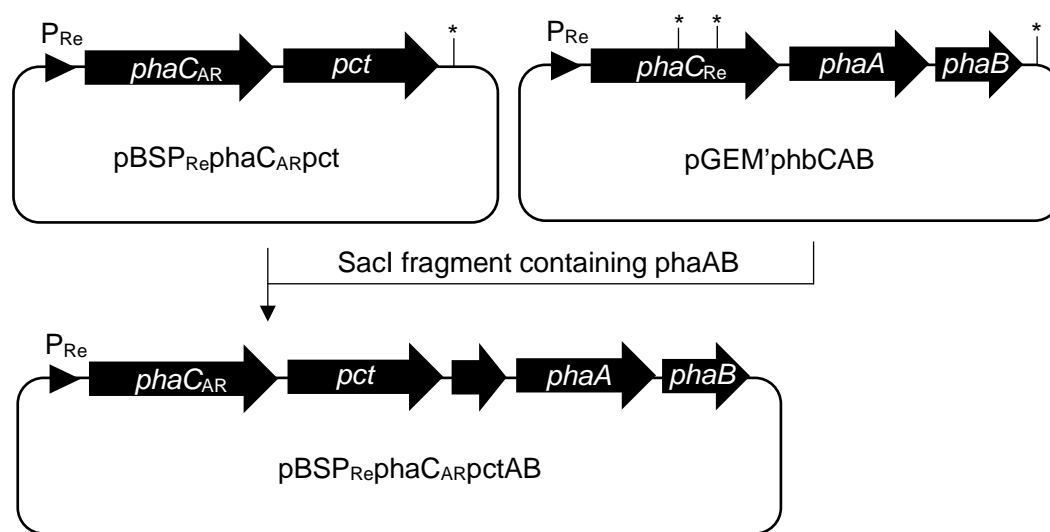

\* *SacI* site

Table S1. P(GL-*co*-3HB) production in *E. coli* harboring pBSP<sub>Re</sub>phaC<sub>AR</sub>pctAB grown on glucose and GL

| GL | Cell dry weight<br>(g/L) | Polymer<br>production<br>(g/L) | GL (mol%) | 3HB (mol%) |
|----|--------------------------|--------------------------------|-----------|------------|
| 0  | 5.2                      | 1.5                            | 0         | 100        |
| 5  | 4.2                      | 0.58                           | 8         | 92         |
| 10 | 4.7                      | 1.2                            | 7         | 93         |

The glucose concentration was 10 g/L.

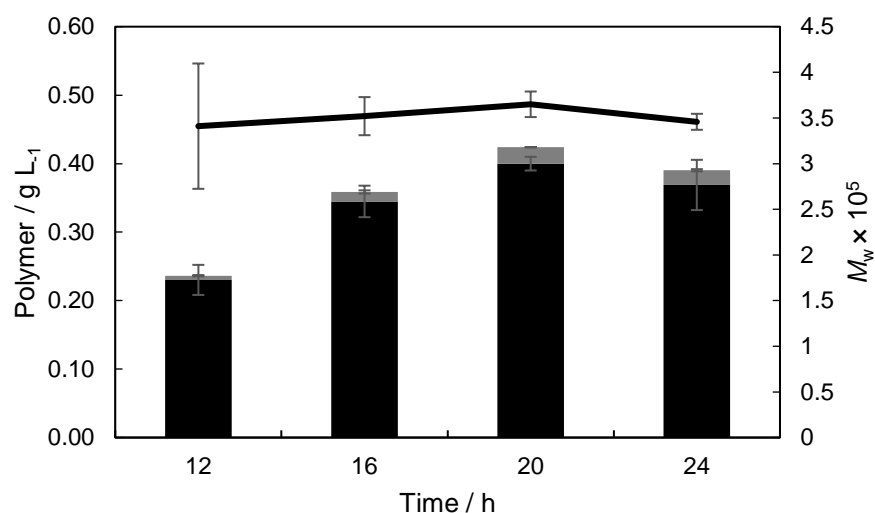

Figure S1. The time-course of P(GL-*co*-3HB) production by PhaC1<sub>Ps</sub>STQK. The polymer was produced with the supplementation of 4 g/L sodium GL. GL and 3HB were supplemented at 0 h. Black bar, 3HB; gray bar, GL. The line graph indicates the weight average molecular weight. The data are the average  $\pm$  standard deviations of three trials. Doublet data is marked at 20 h.

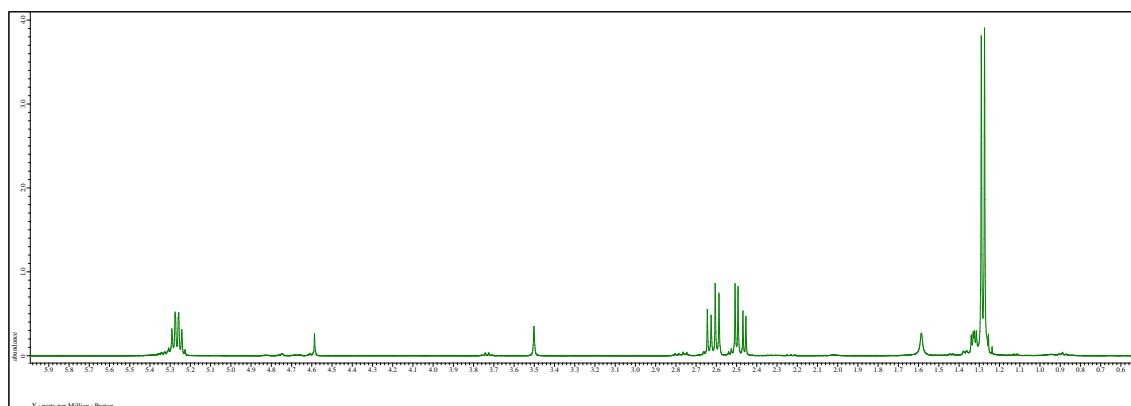

(A): P(GL-*co*-3HB) synthesized by PhaC<sub>1PsSTQK</sub> at 24 h

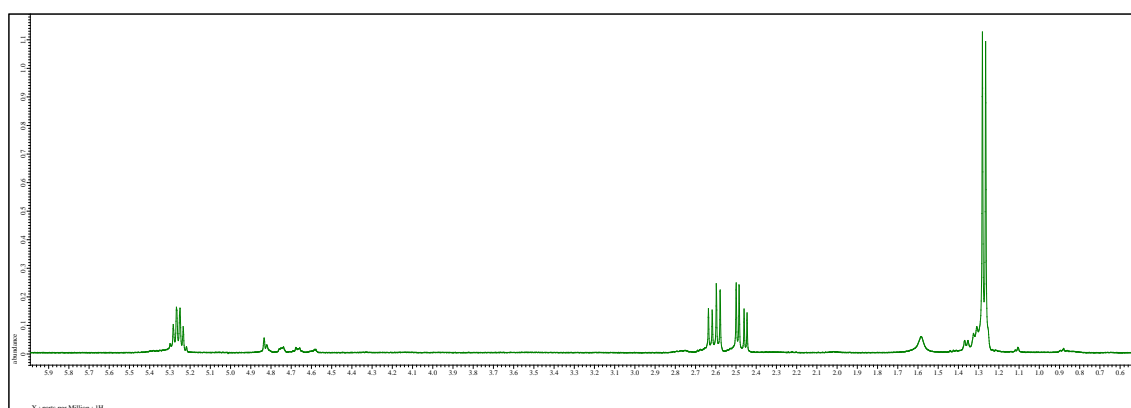

(B): P(GL-*co*-3HB) synthesized by PhaC<sub>AR</sub> at 24 h produced with the initial addition of GL and 3HB

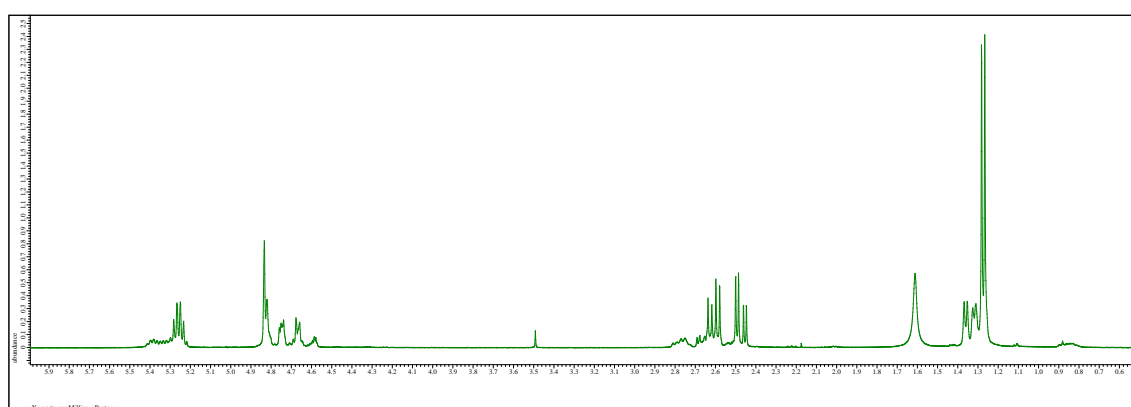

(C): P(GL-*co*-3HB) synthesized by PhaC<sub>AR</sub> at 24 h produced with the 3HB addition at 12 h

Figure S2. <sup>1</sup>H NMR analysis of P(GL-*co*-3HB)s.

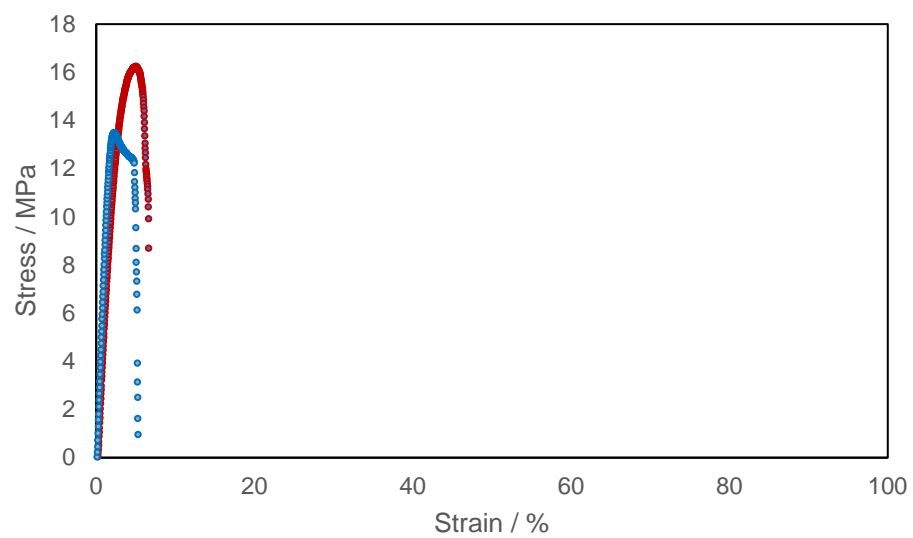

Figure S3. Stress/strain test of solvent-cast films of P(3HB) (blue) and P(GL-*ran*-3HB)-*b*-P(3HB) containing 20 mol% total GL units (red).

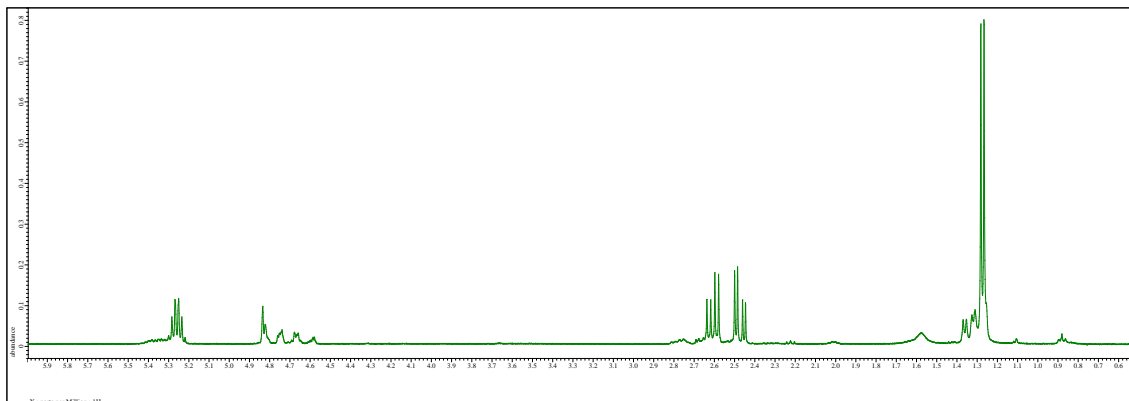

Original P(GL-*co*-3HB) synthesized by PhaCAR

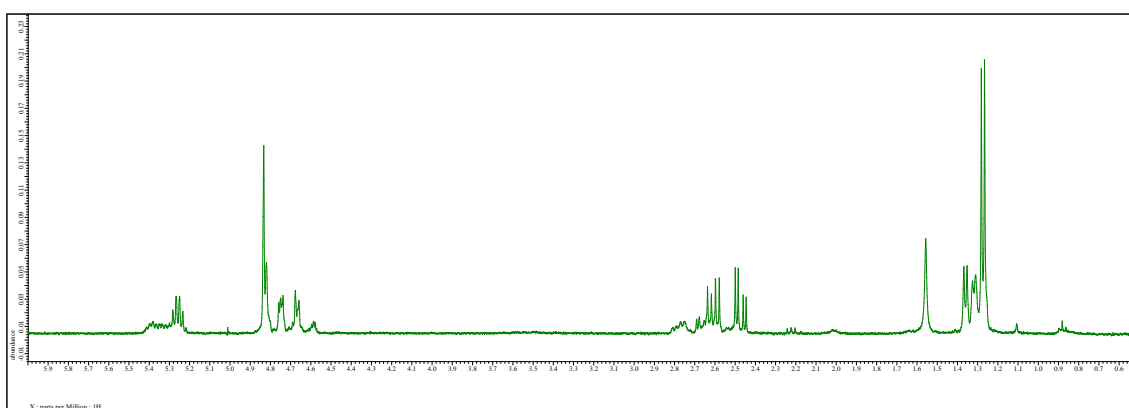

Precipitated fraction of P(GL-*co*-3HB) synthesized by PhaCAR

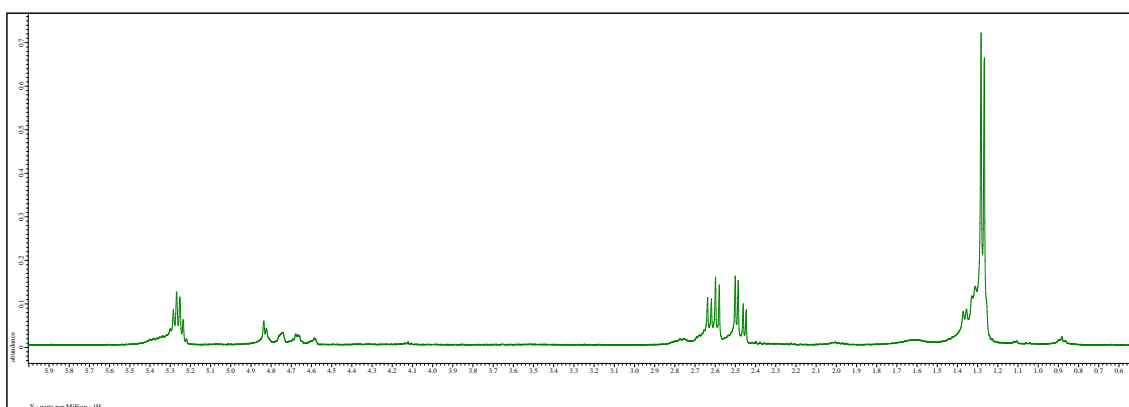

Soluble fraction of P(GL-*co*-3HB) synthesized by PhaCAR

Figure S4.  $^1\text{H}$  NMR analysis of solvent-fractionated P(GL-*co*-3HB) synthesized by PhaCAR. The chloroform solution of the original polymer was partially precipitated by adding methanol.
